# Supplementary material
Source: publisher figshare collection journal article supplement (https://gsapubs.figshare.com/ndownloader/files/40838633)
Supplement: Supplementary file 1 [file 40838633]

## Sheet: Sheet1
Table S3. Major elements of amphibole from the Fe-mineralized and barren plutons in the Laiwu district
SiO2	TiO2	Al2O3	FeO	MnO	MgO	CaO	Na2O	K2O	Sum	Si	Ti	Al	Cr	Fe	Mn	Mg	Ca	Na	K	F	Cl	Si to Mg sum	Xal	Si	Ti	Al	Cr	Fe	Mn	Mg	Ca	Na	K	F	Cl	sum	H2O	Fe2O3	FeO	O=F,Cl	Total	P1a	P1b	P1c	P1d	P1e	T (°C)	P (MPa)	logfO2
Kuangshan Pluton
50.805	1.275	4.283	9.068	0.262	17.032	11.962	1.307	0.345	96.403	0.845566	0.0159578	0.0840125	0	0.126214	0.00369342	0.422588	0.213306	0.0421756	0.00732523	0	0.00180521	1.49803	0.0477116	7.33786	0.138483	0.729065	0	1.09529	0.0320517	3.66724	1.85108	0.366002	0.0635687	0	0.0156657	15.2807	1.94362	1.71603	7.5239	-0.0144408	98.5041	47.1678	66.6719	-137.419	-894.995	268.631	758.771	66.6719	-13.5267
51.557	1.022	4.556	9.266	0.062	17.406	11.401	1.569	0.329	97.207	0.858082	0.0127913	0.0893675	0	0.12897	0.000874015	0.431868	0.203302	0.0506301	0.00698551	0	0.00110005	1.52195	0.0501256	7.32944	0.109259	0.763347	0	1.10162	0.00746554	3.68887	1.73654	0.432465	0.0596678	0	0.00939623	15.2287	1.9809	3.68338	5.95164	-0.00879983	99.5481	57.2495	68.9113	-156.591	-634.91	309.393	747.534	68.9113	-13.4119
51.326	1.041	4.784	8.354	0.265	18.466	11.27	1.387	0.23	97.196	0.854237	0.0130291	0.0938398	0	0.116276	0.00373571	0.458168	0.200966	0.0447571	0.00488349	0	0.00205906	1.53929	0.0524276	7.21444	0.110037	0.792521	0	0.98201	0.0315498	3.86944	1.69726	0.377995	0.0412433	0	0.0173898	15.1165	1.99541	7.0413	2.01815	-0.0164715	99.8804	73.9285	83.5513	-70.8927	-696.926	242.779	791.672	83.5513	-12.291
50.578	1.244	5.203	9.35	0.231	17.802	11.955	0.84	0.182	97.461	0.841788	0.0155699	0.102059	0	0.130139	0.00325641	0.441693	0.213181	0.027106	0.00386432	0	0.00214368	1.53451	0.0573796	7.13145	0.131904	0.864619	0	1.10251	0.0275876	3.74193	1.80603	0.229636	0.0327377	0	0.0181608	15.0684	1.98844	6.92022	3.12309	-0.0171484	100.126	41.543	85.8921	-68.0564	-1239.84	150.623	778.916	85.8921	-12.8901
50.746	1.288	5.365	9.261	0.163	16.882	11.244	1.493	0.485	97.303	0.844584	0.0161206	0.105236	0	0.128901	0.00229781	0.418867	0.200503	0.0481776	0.0102978	0.0165807	0.00172059	1.51601	0.0592886	7.24245	0.138236	0.902419	0	1.10534	0.0197041	3.59185	1.71934	0.413131	0.0883052	0.142182	0.0147543	15.2208	1.82691	3.68809	5.94241	-0.146401	99.353	75.4277	87.234	-71.2	-532.185	332.257	772.481	87.234	-12.9836
51.987	1.077	4.407	7.775	0.18	17.275	11.21	0.965	0.188	95.476	0.865239	0.0134797	0.0864448	0	0.108218	0.00253746	0.428618	0.199897	0.0311396	0.00399172	0.0179493	0.00200265	1.50454	0.0496934	7.47613	0.116472	0.74693	0	0.935058	0.021925	3.70349	1.72721	0.269063	0.0344906	0.155091	0.017304	15.0308	1.79788	2.86361	5.19829	-0.159605	97.4012	38.7344	74.8668	-143.977	-1037.4	234.267	748.018	74.8668	-14.5852
51.041	1.211	4.945	7.457	0.138	18.777	12.302	0.644	0.357	97.02	0.849494	0.0151568	0.0969979	0	0.103791	0.00194539	0.465884	0.219369	0.0207812	0.00758002	0.00384251	0.00211548	1.53327	0.0544626	7.20253	0.128509	0.822407	0	0.880007	0.0164942	3.95005	1.85995	0.176196	0.064268	0.0325791	0.0179363	15.1004	1.9544	5.22809	2.75269	-0.0476609	99.4505	33.2554	82.0942	-88.4967	-1325.26	149.928	766.908	82.0942	-12.1898
51.398	1.323	4.044	8.056	0.126	18.538	12.676	1.107	0.378	97.7	0.855436	0.0165586	0.0793244	0	0.112129	0.00177622	0.459954	0.226038	0.0357218	0.0080259	0	0.00152314	1.52518	0.0441928	7.29139	0.141139	0.676129	0	0.95574	0.0151398	3.92046	1.92666	0.304478	0.0684096	0	0.0129827	15.2995	1.98152	2.17902	6.09529	-0.0121844	99.8876	33.0977	61.1649	-167.627	-1147.03	199.809	752.077	61.1649	-12.2995
51.06	1.104	4.603	8.896	0.173	17.374	11.505	1.29	0.404	96.481	0.84981	0.0138176	0.0902894	0	0.12382	0.00243878	0.431074	0.205157	0.041627	0.00857795	0	0.00203086	1.51125	0.0511088	7.31019	0.118861	0.776683	0	1.06512	0.0209788	3.70816	1.76479	0.358082	0.0737888	0	0.0174697	15.1967	1.95899	3.74766	5.52381	-0.0162458	98.7992	54.4169	73.7894	-120.09	-790.6	265.044	757.489	73.7894	-13.13
51.754	1.162	3.904	9.712	0.255	17.385	11.32	1.185	0.382	97.164	0.861361	0.0145435	0.0765783	0	0.135178	0.00359474	0.431347	0.201858	0.0382388	0.00811083	0	0.00296167	1.5226	0.0432448	7.35431	0.124173	0.653827	0	1.15415	0.0306919	3.68285	1.72347	0.326483	0.0692504	0	0.0252868	15.1192	1.96592	5.11108	5.11298	-0.0236919	99.6183	49.6138	65.3982	-145.726	-939.733	205.751	754.234	65.3982	-13.6463
49.808	1.312	5.731	10.002	0.278	16.198	11.668	1.548	0.543	97.162	0.828973	0.0164209	0.112416	0	0.139214	0.00391897	0.401896	0.208064	0.0499524	0.0115293	0	0.00208727	1.50284	0.0634262	7.17086	0.142046	0.972428	0	1.20425	0.0339003	3.47652	1.79981	0.432103	0.0997317	0	0.0180555	15.3316	1.94751	2.49493	7.75703	-0.0166971	99.3428	84.9685	91.4848	-34.8675	-492.096	378.708	780.473	91.4848	-12.7389
51.282	1.07	4.685	9.946	0.236	16.798	11.389	1.202	0.397	97.062	0.853505	0.0133921	0.0918979	0	0.138435	0.0033269	0.416782	0.203089	0.0387873	0.00842932	0	0.00160776	1.51734	0.0519889	7.31251	0.114738	0.787347	0	1.18606	0.0285036	3.57084	1.73999	0.332315	0.0722193	0	0.0137747	15.1445	1.97055	4.41405	5.97418	-0.0128613	99.4619	54.2777	75.1237	-111.674	-856.013	244.962	753.715	75.1237	-13.7137
50.828	1.154	5.528	10.344	0.258	16.303	11.347	1.512	0.511	97.85	0.845949	0.0144434	0.108434	0	0.143975	0.00363703	0.404501	0.20234	0.0487907	0.0108498	0	0.00183341	1.52094	0.060818	7.23063	0.123453	0.926821	0	1.2306	0.031087	3.45741	1.72947	0.417032	0.0927374	0	0.0156708	15.2392	1.97334	3.70221	7.0127	-0.0146664	100.18	82.8582	88.4346	-55.7379	-509.461	353.206	769.673	88.4346	-13.231
50.752	1.182	5.706	8.771	0.183	17.781	11.256	1.483	0.483	97.697	0.844684	0.0147939	0.111925	0	0.122081	0.00257975	0.441172	0.200717	0.0478549	0.0102553	0	0.00282064	1.53724	0.062317	7.14327	0.125108	0.946522	0	1.0324	0.0218163	3.73088	1.69741	0.404697	0.0867266	0	0.0238534	15.1888	1.98626	5.9527	3.41469	-0.0225637	100.257	90.7759	97.8489	-27.8968	-484.321	308.679	791.114	97.8489	-11.9038
50.609	0.925	4.202	9.874	0.307	17.112	11.424	1.247	0.334	96.088	0.842304	0.0115773	0.0824237	0	0.137433	0.00432778	0.424573	0.203713	0.0402394	0.00709167	0	0.00152314	1.50264	0.0470003	7.28715	0.10016	0.713084	0	1.18899	0.0374416	3.67317	1.76241	0.348129	0.0613532	0	0.0131774	15.1719	1.95204	5.33443	5.07401	-0.0121844	98.5623	56.791	69.1169	-119.078	-876.392	228.015	760.091	69.1169	-13.1929
50.362	0.936	4.405	9.736	0.337	17.757	11.252	1.315	0.369	96.516	0.838193	0.0117149	0.0864056	0	0.135512	0.00475069	0.440577	0.200646	0.0424337	0.00783481	0	0.0013257	1.51715	0.0488701	7.18221	0.100382	0.740382	0	1.16116	0.0407072	3.77516	1.71927	0.363601	0.067134	0	0.0113595	15.15	1.9727	7.68914	2.81721	-0.0106049	99.2485	74.0663	76.0694	-76.9767	-766.214	214.947	781.738	76.0694	-11.5967
49.904	1.136	5.168	9.64	0.268	17.586	11.297	1.438	0.452	96.964	0.830571	0.0142181	0.101372	0	0.134176	0.003778	0.436334	0.201448	0.0464028	0.00959711	0	0.00211548	1.52045	0.057018	7.10147	0.121567	0.866742	0	1.14722	0.0323023	3.7307	1.7224	0.396749	0.0820564	0	0.0180876	15.2012	1.9703	7.1307	3.2237	-0.0169228	99.6318	87.0266	87.7777	-39.4976	-606.899	252.676	792.265	87.7777	-11.5297
50.062	1.344	5.462	10.178	0.229	17.201	11.434	1.456	0.469	97.901	0.8332	0.0168214	0.107139	0	0.141664	0.00322822	0.426781	0.203891	0.0469837	0.00995807	0	0.00186162	1.52883	0.0598653	7.08488	0.143036	0.911025	0	1.2046	0.0274502	3.62901	1.73373	0.399512	0.0846755	0	0.0158297	15.2179	1.98342	6.39939	4.41975	-0.014892	100.511	81.9036	89.7096	-39.3271	-625.041	255.097	790.103	89.7096	-12.1251
51.985	1.222	4.03	7.91	0.216	18.469	11.606	1.051	0.272	96.855	0.865205	0.0152945	0.0790498	0	0.110097	0.00304496	0.458242	0.206958	0.0339147	0.00577525	0	0.0026514	1.53093	0.0444704	7.34694	0.129874	0.671256	0	0.934891	0.0258564	3.89119	1.75739	0.287988	0.0490409	0	0.0225145	15.0944	1.97945	4.92063	3.48236	-0.0212099	99.3062	43.065	69.5192	-135.863	-1049.66	189.83	766.437	69.5192	-13.124
50.495	1.238	5.157	9.901	0.186	16.662	11.4	1.481	0.419	96.989	0.840407	0.0154948	0.101156	0	0.137809	0.00262204	0.413408	0.203285	0.0477904	0.00889644	0	0.00141032	1.5109	0.0571224	7.231	0.133319	0.870365	0	1.18573	0.0225605	3.55703	1.74909	0.411196	0.0765464	0	0.0121346	15.2368	1.9638	3.85182	6.43509	-0.0112818	99.3274	68.3917	81.0814	-88.2486	-626.438	305.174	767.449	81.0814	-13.2051
51.791	1.192	4.054	8.781	0.219	18.309	10.85	1.123	0.264	96.662	0.861977	0.014919	0.0795206	0	0.12222	0.00308725	0.454273	0.193477	0.0362381	0.00560539	0	0.0022283	1.536	0.0448935	7.29539	0.126268	0.673028	0	1.03441	0.0261291	3.84477	1.63751	0.306703	0.0474416	0	0.0188594	14.9917	1.98967	8.06128	1.52736	-0.0178253	99.4415	55.2029	73.6713	-117.579	-937.529	171.614	775.1	73.6713	-12.1062
52.261	1.265	3.604	8.748	0.164	18.972	10.946	0.945	0.206	97.188	0.869799	0.0158327	0.0706937	0	0.12176	0.00231191	0.470723	0.195189	0.0304942	0.00437391	0	0.00217189	1.55112	0.0396893	7.28982	0.132694	0.592487	0	1.02048	0.0193762	3.94514	1.63589	0.255573	0.0366579	0	0.0182027	14.9281	2.00993	9.51246	0.188568	-0.017374	100.134	42.6153	67.1776	-148.898	-1167.45	123.763	770.12	67.1776	-10.7436
51.022	1.034	3.849	9.737	0.245	17.373	11.586	1.191	0.361	96.686	0.849178	0.0129415	0.0754995	0	0.135526	0.00345377	0.431049	0.206601	0.0384324	0.00766495	0.00957996	0.00298987	1.50765	0.042889	7.32221	0.111591	0.65101	0	1.1686	0.0297808	3.71681	1.78146	0.331391	0.0660926	0.0826051	0.0257808	15.1789	1.8647	4.82423	5.3961	-0.100552	98.9335	46.4334	62.5401	-154.249	-982.96	205.17	750.046	62.5401	-13.1296
51.633	1.266	4.509	10.348	0.216	17.111	11.433	1.374	0.52	98.636	0.859347	0.0158452	0.0884456	0	0.14403	0.00304496	0.424548	0.203873	0.0443376	0.0110409	0.0083693	0.00188983	1.53526	0.0492867	7.27662	0.134171	0.748923	0	1.21959	0.0257835	3.59491	1.72632	0.375434	0.0934903	0.070868	0.0160023	15.1952	1.92045	4.78961	6.03824	-0.0820679	100.954	61.4428	71.299	-117.241	-745.376	247.299	758.541	71.299	-13.2293
52.633	1.257	3.033	8.001	0.249	18.276	12.889	0.64	0.184	97.223	0.87599	0.0157326	0.0594933	0	0.111363	0.00351016	0.453454	0.229836	0.0206522	0.00390679	0	0.00172059	1.51954	0.0335374	7.49427	0.134595	0.508978	0	0.952735	0.0300301	3.87939	1.9663	0.176683	0.0334234	0	0.01472	15.1764	1.97247	0.845401	7.2403	-0.0137638	99.2664	18.2481	50.1143	-232.523	-1646.74	142.074	728.371	50.1143	-14.3776
51.417	1.096	4.732	9.799	0.229	16.603	11.387	1.413	0.441	97.164	0.855752	0.0137175	0.0928198	0	0.136389	0.00322822	0.411944	0.203053	0.0455961	0.00936355	0	0.0013257	1.51385	0.0523854	7.34866	0.117797	0.797078	0	1.17122	0.0277219	3.53752	1.74369	0.391551	0.0804083	0	0.0113843	15.2156	1.96838	2.88857	7.19983	-0.0106049	99.4112	62.0852	74.31	-116.272	-668.945	317.1	752.882	74.31	-13.7748
52.154	1.023	4.576	7.875	0.089	19.011	11.554	0.811	0.209	97.373	0.868018	0.0128038	0.0897598	0	0.109609	0.00125463	0.47169	0.206031	0.0261702	0.0044376	0	0.00200265	1.55314	0.0501515	7.26545	0.10717	0.751304	0	0.917449	0.0105015	3.94812	1.72451	0.219048	0.0371435	0	0.0167625	14.9807	2.014	7.61462	1.02326	-0.0160202	100.134	37.8338	78.0029	-120.611	-1200.17	148.425	761.776	78.0029	-12.0426
52.517	1.067	3.962	8.457	0.115	18.051	12.624	0.761	0.182	97.8	0.87406	0.0133545	0.077716	0	0.11771	0.00162116	0.447871	0.225111	0.0245567	0.00386432	0	0.00180521	1.53233	0.0435173	7.41535	0.113297	0.659327	0	0.998629	0.0137536	3.79965	1.9098	0.208334	0.0327841	0	0.015315	15.1509	1.98848	2.09574	6.57123	-0.0144408	99.984	22.115	59.2055	-204.002	-1458.12	165.589	725.566	59.2055	-14.2292
50.969	1.059	5.753	9.527	0.272	17.189	11.409	1.249	0.341	97.872	0.848296	0.0132544	0.112847	0	0.132603	0.00383439	0.426484	0.203445	0.040304	0.0072403	0	0.00293346	1.53732	0.0631027	7.17343	0.112083	0.954267	0	1.12133	0.0324247	3.60647	1.72039	0.340822	0.061226	0	0.0248062	15.1224	1.9854	5.96632	4.15843	-0.0234662	100.432	73.7093	97.9022	-29.0844	-718.403	266.142	783.319	97.9022	-12.8605
52.687	0.833	3.713	7.322	0.174	19.259	11.701	1.061	0.255	97.069	0.876889	0.0104258	0.0728318	0	0.101912	0.00245288	0.477843	0.208652	0.0342374	0.0054143	0	0.00180521	1.54236	0.0406732	7.39101	0.0878755	0.613875	0	0.858986	0.0206745	4.02758	1.75866	0.288576	0.0456353	0	0.0152155	15.0929	2.00158	5.46439	2.40507	-0.0144408	99.6036	41.502	64.5283	-163.064	-1036.09	195.2	753.776	64.5283	-12.7198
Jiaoyu Pluton
47.852	1.069	7.934	14.013	0.379	13.376	10.715	2.159	0.917	98.884	0.796418	0.0133796	0.155628	0	0.195042	0.00534277	0.331878	0.19107	0.0696688	0.0194702	0.0225287	0.00118467	1.49769	0.0875349	6.91294	0.116135	1.35086	0	1.69297	0.0463755	2.88071	1.65849	0.604728	0.169003	0.19555	0.010283	15.4322	1.75695	4.60182	9.87222	-0.189695	100.912	285.105	142.168	119.726	347.685	775.982	798.447	142.168	-12.2529
47.649	1.008	6.752	14.41	0.391	14.837	10.64	1.606	0.584	97.949	0.79304	0.0126161	0.132443	0	0.200568	0.00551193	0.368127	0.189732	0.051824	0.0123998	0	0.00203086	1.51231	0.0749848	6.81709	0.10845	1.1385	0	1.72411	0.0473814	3.16448	1.63097	0.445487	0.106591	0	0.0174575	15.183	1.96037	11.113	4.41039	-0.0162458	101.007	163.372	118.24	73.3572	-351.11	268.064	803.504	118.24	-11.7
48.203	1.102	7.896	13.722	0.212	12.914	10.956	2.356	0.849	98.245	0.80226	0.0137926	0.154883	0	0.190992	0.00298857	0.320415	0.195367	0.0760258	0.0180264	0	0.000987223	1.48533	0.0872702	7.02159	0.120716	1.35557	0	1.67161	0.0261567	2.80435	1.7099	0.665397	0.157772	0	0.00864043	15.5331	1.93396	1.06588	12.7629	-0.00789729	100.278	228.52	127.046	55.0322	422.077	1043.95	772.53	127.046	-13.2072
47.395	1.007	7.125	13.944	0.398	13.386	10.832	1.654	0.886	96.699	0.788812	0.0126036	0.139759	0	0.194082	0.00561061	0.332126	0.193156	0.0533729	0.018812	0	0.00203086	1.47299	0.0803984	6.96171	0.111234	1.23346	0	1.71288	0.0495168	2.9312	1.70471	0.471046	0.166027	0	0.0179235	15.3418	1.90896	5.19439	9.27002	-0.0162458	99.1121	172.492	123.267	80.2957	-125.002	479.58	779.975	123.267	-12.6528
47.826	0.729	8.412	13.901	0.449	13.779	10.832	1.361	0.468	97.824	0.795986	0.00912413	0.165004	0	0.193483	0.00632956	0.341877	0.193156	0.0439181	0.00993683	0	0.00188983	1.5118	0.0938156	6.84468	0.0784584	1.41887	0	1.66376	0.0544279	2.9398	1.66095	0.377652	0.0854468	0	0.0162506	15.124	1.96091	8.8198	5.96483	-0.0151177	100.653	164.679	168.377	153.656	-357.334	368.459	803.026	168.377	-13.0144
48.468	0.865	6.919	13.619	0.366	14.201	10.677	1.175	0.442	96.805	0.806671	0.0108263	0.135719	0	0.189558	0.00515951	0.352347	0.190392	0.0379161	0.00938479	0	0.00205906	1.50028	0.0780901	6.98984	0.0938104	1.17601	0	1.64253	0.0447074	3.0531	1.64976	0.328545	0.0813196	0	0.0178419	15.0596	1.9444	8.7292	5.76436	-0.0164715	99.6075	102.294	123.025	50.7582	-657.091	256.062	777.747	123.025	-13.4468
49.308	0.953	6.48	14.224	0.46	13.974	10.841	1.154	0.366	97.831	0.820651	0.0119277	0.127107	0	0.197979	0.00648463	0.346715	0.193317	0.0372384	0.00777111	0	0.00200265	1.51086	0.0726664	7.06116	0.10263	1.09368	0	1.70348	0.055796	2.98325	1.66336	0.320412	0.0668653	0	0.0172315	15.0506	1.95872	8.02445	7.0035	-0.0160202	100.578	90.0496	110.188	24.1869	-771.04	239.983	773.658	110.188	-14.35
47.54	1.019	6.789	14.165	0.286	13.544	11.001	1.446	0.538	96.562	0.791226	0.0127538	0.133169	0	0.197158	0.00403175	0.336046	0.19617	0.046661	0.0114231	0.00821139	0.0022001	1.47438	0.0770367	6.97643	0.112453	1.17418	0	1.73839	0.0355489	2.963	1.72968	0.411421	0.10072	0.0724018	0.0193988	15.2418	1.83954	6.12667	8.65214	-0.0832867	98.9321	100.711	109.004	16.8412	-527.159	321.98	765.741	109.004	-13.7425
49.588	0.935	6.041	13.874	0.418	14.161	10.797	1.39	0.345	97.627	0.825311	0.0117024	0.118496	0	0.193107	0.00589255	0.351355	0.192532	0.0448539	0.00732523	0	0.0022001	1.50586	0.0676899	7.12484	0.101026	1.02297	0	1.66708	0.0508699	3.03321	1.66211	0.38722	0.0632381	0	0.0189932	15.1126	1.95051	6.94243	7.62712	-0.0175997	100.255	93.6318	98.0671	-14.7166	-631.753	285.145	767.894	98.0671	-14.6428
47.606	0.915	7.905	11.873	0.167	13.966	11.088	1.4	0.853	96.16	0.792324	0.0114521	0.155059	0	0.165256	0.0023542	0.346516	0.197721	0.0451766	0.0181114	0.0184756	0.00101543	1.47296	0.0894244	6.99286	0.101073	1.36851	0	1.45851	0.0207776	3.05827	1.74504	0.398717	0.159846	0.163061	0.00896192	15.3036	1.76051	3.57342	8.65759	-0.155919	98.1226	123.688	142.866	79.9778	-243.783	503.9	765.723	142.866	-12.5652
46.745	1.054	6.295	13.181	0.315	13.661	11.146	1.573	0.619	94.991	0.777994	0.0131918	0.123479	0	0.183462	0.00444056	0.338949	0.198755	0.0507591	0.0131429	0.0170544	0.0022001	1.44152	0.0724566	7.01617	0.118968	1.11356	0	1.65451	0.0400462	3.05674	1.79243	0.45776	0.118527	0.153802	0.0198411	15.3687	1.7214	4.02849	9.55611	-0.154027	96.962	106.244	99.0736	2.29178	-417.58	390.055	767.581	99.0736	-13.2082
47.156	1.073	7.864	14.425	0.372	13.329	10.789	1.488	0.55	97.313	0.784835	0.0134296	0.154255	0	0.200777	0.00524409	0.330712	0.192389	0.0480163	0.0116779	0.00936941	0.00251037	1.48925	0.0885844	6.85099	0.11723	1.34653	0	1.75262	0.0457768	2.88685	1.67941	0.419144	0.101939	0.0817876	0.0219135	15.2005	1.8465	7.65719	7.53496	-0.0950322	99.8316	148.736	144.748	110.049	-353.232	356.668	795.266	144.748	-13.2574
48.037	1.037	8.138	13.76	0.434	13.772	10.624	1.273	0.464	97.623	0.799497	0.012979	0.15963	0	0.191521	0.0061181	0.341703	0.189447	0.0410784	0.0098519	0	0.00236933	1.51145	0.0911219	6.8765	0.111633	1.37298	0	1.64727	0.052622	2.939	1.62944	0.353317	0.0847365	0	0.0203787	15.0675	1.95637	8.85468	5.79244	-0.0189535	100.448	146.631	163.547	140.761	-452.958	315.375	806.134	163.547	-13.215
47.754	0.914	7.437	13.791	0.308	14.032	10.884	1.421	0.487	97.156	0.794787	0.0114396	0.145879	0	0.191952	0.00434188	0.348154	0.194083	0.0458542	0.0103403	0.0022634	0.00239754	1.49655	0.0835108	6.90402	0.0993713	1.2672	0	1.66742	0.0377163	3.02428	1.68593	0.398318	0.0898218	0.0196613	0.0208265	15.1741	1.91741	7.96036	6.62817	-0.0372852	99.8337	122.411	130.665	69.6875	-459.385	321.328	783.771	130.665	-13.1885
48.318	1.034	6.079	13.931	0.376	14.065	10.817	1.17	0.5	96.358	0.804174	0.0129415	0.119242	0	0.193901	0.00530048	0.348973	0.192889	0.0377547	0.0106163	0	0.00191803	1.48453	0.0690939	7.04213	0.113328	1.0442	0	1.69798	0.0464161	3.05595	1.68912	0.330617	0.0929664	0	0.0167962	15.1127	1.92501	7.68699	7.01414	-0.0153433	99.0378	84.6679	100.532	0.852609	-770.007	228.468	766.891	100.532	-13.9964
50.611	0.971	5.469	13.356	0.418	14.85	10.887	0.957	0.316	97.942	0.842337	0.012153	0.107276	0	0.185898	0.00589255	0.36845	0.194137	0.0308814	0.00670949	0	0.00301808	1.52201	0.0611702	7.1947	0.103803	0.916285	0	1.58782	0.0503304	3.14706	1.65819	0.263769	0.0573081	0	0.0257785	14.9793	1.96466	7.9388	6.21257	-0.0241431	100.678	62.093	90.2226	-44.9417	-1013.94	185.79	757.781	90.2226	-13.9055
48.673	0.952	7.566	14.208	0.325	14.073	10.692	1.082	0.422	98.068	0.810083	0.0119152	0.14841	0	0.197756	0.00458153	0.349171	0.19066	0.0349151	0.00896014	0	0.00211548	1.52192	0.084494	6.91961	0.101778	1.26769	0	1.68921	0.0391348	2.98257	1.62859	0.29824	0.0765362	0	0.0180701	15.0034	1.97222	9.88571	5.31271	-0.0169228	101.014	100.352	138.498	77.2385	-716.063	230.348	781.513	138.498	-12.8567
49.568	1.11	5.273	13.932	0.415	14.085	10.908	1.041	0.355	97.055	0.824978	0.0138927	0.103432	0	0.193915	0.00585026	0.349469	0.194511	0.033592	0.00753756	0.0158964	0.00186162	1.49154	0.0598848	7.19038	0.121087	0.901494	0	1.69013	0.05099	3.04592	1.69533	0.292783	0.0656961	0.138551	0.0162256	15.0538	1.79953	6.6548	7.94392	-0.142055	99.3792	59.9124	83.761	-61.3064	-1005.93	194.523	752.518	83.761	-15.1119
47.799	1.231	8.102	14.154	0.36	14.248	10.825	0.982	0.45	98.25	0.795536	0.0154071	0.158924	0	0.197005	0.00507493	0.353513	0.193031	0.0316882	0.00955465	0	0.00279243	1.52546	0.0903111	6.77958	0.1313	1.35435	0	1.67888	0.0432486	3.01265	1.64502	0.270047	0.0814249	0	0.0237971	14.9965	1.9711	11.0782	4.18568	-0.022338	101.309	108.868	160.352	134.21	-772.111	196.943	806.492	160.352	-11.9713
47.639	1.164	6.29	14.174	0.378	15.832	10.672	1.348	0.495	98.065	0.792873	0.0145686	0.123381	0	0.197283	0.00532867	0.392815	0.190303	0.0434986	0.0105101	0	0.00205906	1.52625	0.0696844	6.75339	0.12409	1.05091	0	1.68038	0.0453876	3.34584	1.62093	0.370504	0.0895211	0	0.0175383	15.081	1.97836	13.9886	1.58686	-0.0164715	101.428	129.092	111.887	62.6394	-653.352	162.755	813.33	111.887	-10.0416
47.368	1.291	7.909	13.334	0.228	14.658	11.056	2.231	0.86	98.981	0.788363	0.0161581	0.155138	0	0.185591	0.00321412	0.363686	0.19715	0.0719921	0.01826	0	0.00129749	1.51215	0.0862091	6.77758	0.138912	1.33372	0	1.59553	0.0276319	3.12662	1.69491	0.618918	0.156982	0	0.0111546	15.4708	1.9664	6.20018	7.755	-0.0103793	101.558	254.996	137.159	107.119	271.566	613.923	811.65	137.159	-11.034
48.943	1.153	6.997	14.131	0.331	14.186	10.686	1.489	0.408	98.405	0.814576	0.0144309	0.137249	0	0.196685	0.00466611	0.351975	0.190553	0.0480485	0.00866288	0	0.00228471	1.51958	0.07768	6.96869	0.123456	1.17416	0	1.68263	0.0399185	3.01114	1.63018	0.411055	0.0741108	0	0.0195457	15.1153	1.96772	8.36286	6.60599	-0.0182766	101.192	117.237	119.652	40.5233	-487.574	291.639	786.583	119.652	-13.9082
48.359	1.06	6.104	13.866	0.395	13.73	10.961	1.385	0.478	96.794	0.804857	0.0132669	0.119732	0	0.192996	0.00556832	0.340661	0.195456	0.0446926	0.0101492	0.0198968	0.0022001	1.47708	0.0693143	7.08366	0.116764	1.05378	0	1.69859	0.0490076	2.99821	1.72024	0.393346	0.0893242	0.175115	0.0193634	15.2029	1.74374	5.64497	8.78658	-0.176764	98.9265	92.245	97.6856	-7.80815	-619.955	300.218	766.192	97.6856	-14.2846
47.884	1.023	6.221	15.304	0.343	12.874	11.148	1.519	0.553	97.474	0.796951	0.0128038	0.122027	0	0.213011	0.00483528	0.319422	0.198791	0.0490166	0.0117416	0.0280556	0.00203086	1.46905	0.070593	7.05242	0.113304	1.07985	0	1.88499	0.0427886	2.82665	1.75915	0.43376	0.103904	0.248271	0.0179716	15.2968	1.66533	4.80679	10.9788	-0.240676	99.3802	90.6432	91.2371	-28.2332	-569.204	332.276	748.744	91.2371	-14.5853
Jinniushan Pluton
46.782	0.852	9.785	11.84	0.291	14.952	11.074	1.477	0.497	97.919	0.77861	0.0106636	0.191936	0	0.164797	0.00410223	0.370981	0.197471	0.0476613	0.0105526	0.0156859	0.00200265	1.52109	0.108025	6.65439	0.0911365	1.64038	0	1.40844	0.0350597	3.17059	1.68769	0.407338	0.0901877	0.134059	0.0171157	15.1852	1.83876	9.30181	3.47012	-0.141499	100.548	212.078	228.612	233.891	-138.086	440.165	835.212	228.612	-11.1192
48.858	0.742	6.676	10.958	0.308	15.75	11.127	1.379	0.365	96.245	0.813162	0.00928684	0.130952	0	0.152521	0.00434188	0.39078	0.198417	0.0444989	0.00774988	0.00168439	0.00141032	1.50104	0.0747568	7.0425	0.08043	1.13413	0	1.32093	0.0376035	3.38441	1.71841	0.38539	0.067119	0.0145879	0.0122143	15.1709	1.9366	6.73627	4.89662	-0.0247561	98.8317	104.113	117.278	31.5501	-508.896	335.547	786.33	117.278	-12.6615
47.741	0.642	7.401	11.7	0.202	14.924	11.619	1.68	0.534	96.66	0.794571	0.00803524	0.145173	0	0.162848	0.0028476	0.370286	0.20719	0.0542119	0.0113382	0.0103169	0.000592334	1.48376	0.0826491	6.96165	0.0704009	1.27194	0	1.4268	0.0249493	3.24427	1.8153	0.474979	0.0993397	0.0903915	0.00518974	15.3896	1.84757	4.18343	7.9357	-0.0872682	98.8394	120.732	121.046	39.6101	-249.039	511.829	772.879	121.046	-12.14
46.345	0.639	8.931	11.319	0.244	14.466	11.274	2.078	0.64	96.285	0.771337	0.0079977	0.175185	0	0.157545	0.00343967	0.358922	0.201038	0.067055	0.0135888	0.0158964	0.0013257	1.47443	0.0997573	6.80087	0.0705156	1.5446	0	1.38908	0.0303275	3.16461	1.77255	0.591223	0.119813	0.140158	0.0116887	15.4836	1.78171	4.13401	7.59917	-0.137768	98.3431	261.187	177.048	161.755	326.902	908.789	811.09	177.048	-10.9416
47.509	0.701	7.778	11.808	0.222	14.634	11.438	1.822	0.577	96.547	0.79071	0.00877369	0.152568	0	0.164352	0.00312954	0.363091	0.203962	0.0587941	0.0122512	0	0.00163597	1.48262	0.0868033	6.93313	0.0769298	1.33775	0	1.44107	0.0274405	3.18367	1.78839	0.515521	0.107421	0	0.0143446	15.4113	1.92491	4.02852	8.18309	-0.0130869	98.8624	152.93	133.038	70.1791	-65.1906	610.918	782.986	133.038	-12.0196
47.755	0.985	8.335	11.498	0.213	14.632	11.148	1.921	0.577	97.271	0.794804	0.0123282	0.163494	0	0.160037	0.00300266	0.363041	0.198791	0.0619887	0.0122512	0.00789557	0.00160776	1.49671	0.0923831	6.90346	0.10708	1.42007	0	1.39004	0.0260804	3.15328	1.72665	0.538418	0.106411	0.0685788	0.0139646	15.3715	1.87645	4.23541	7.68693	-0.0760219	99.4958	187.165	155.138	109.484	82.2027	669.751	802.609	155.138	-12.0763
47.747	0.709	9.136	12.202	0.229	14.47	11.039	1.334	0.409	97.516	0.794671	0.00887381	0.179206	0	0.169835	0.00322822	0.359021	0.196847	0.0430468	0.00868411	0.00926413	0.00183341	1.51484	0.101624	6.8197	0.0761532	1.53791	0	1.45749	0.0277039	3.08105	1.6893	0.369419	0.0745252	0.0795028	0.015734	15.1332	1.88661	7.88839	5.10393	-0.0887748	100.104	142.558	190.299	156.245	-339.662	408.546	800.192	190.299	-12.5603
48.774	0.036	8.617	11.407	0.434	14.814	11.558	1.527	0.671	98.025	0.811764	0.000450574	0.169025	0	0.15877	0.0061181	0.367557	0.206102	0.0492748	0.014247	0	0.00527459	1.51368	0.0947819	6.97168	0.00386968	1.45164	0	1.36357	0.0525442	3.15669	1.77007	0.423187	0.122358	0	0.0452998	15.3156	1.9346	4.75604	7.12746	-0.0421941	100.394	192.43	169.327	153.686	-42.2856	709.221	784.696	169.327	-11.6802
48.295	0.848	10.89	7.151	0.141	17.116	11.053	2.117	0.833	98.524	0.803791	0.0106135	0.213611	0	0.0995323	0.00198768	0.424672	0.197097	0.0683135	0.0176867	0	0.00225651	1.55421	0.116263	6.72322	0.0887757	1.78673	0	0.832527	0.0166257	3.55212	1.6486	0.5714	0.147939	0	0.0188743	15.3679	2.01325	5.46742	2.23134	-0.0180509	101.067	446.433	299.414	298.253	723.371	1197.28	864.121	299.414	-8.79493
49.279	1.047	9.15	11.204	0.421	14.029	11.328	1.962	0.606	99.066	0.820168	0.0131042	0.17948	0	0.155945	0.00593484	0.34808	0.202001	0.0633118	0.0128669	0	0.00112825	1.52271	0.099662	7.0021	0.111876	1.5323	0	1.33136	0.0506681	2.97169	1.72456	0.540518	0.10985	0	0.00963236	15.3749	1.98165	1.31172	10.0237	-0.00902547	101.17	238.849	187.982	171.858	250.969	1000.23	816.185	187.982	-12.9243
47.825	1.393	8.896	11.426	0.325	16.125	11.173	1.078	0.325	98.619	0.795969	0.0174347	0.174498	0	0.159035	0.00458153	0.400084	0.199237	0.034786	0.00690058	0	0.00149494	1.5516	0.0973476	6.66897	0.146076	1.46202	0	1.33246	0.0383861	3.35208	1.66929	0.291452	0.0578161	0	0.0125252	15.0186	2.01631	11.6267	0.964159	-0.0119587	101.788	132.364	199.419	197.379	-640.573	217.433	848.536	199.419	-11.0205
48.632	0.912	8.408	11.091	0.357	16.061	11.077	0.989	0.263	97.829	0.8094	0.0114146	0.164926	0	0.154372	0.00503263	0.398496	0.197525	0.031914	0.00558416	0	0.00110005	1.54364	0.0927245	6.81648	0.0961293	1.38895	0	1.30006	0.0423831	3.356	1.66348	0.268769	0.0470278	0	0.00926421	14.9793	2.00926	10.8374	1.33936	-0.00879983	100.915	117.273	181.194	159.345	-684.422	237.678	824.99	181.194	-11.2234
47.088	0.827	10.181	10.722	0.157	15.395	11.256	2.144	0.564	98.371	0.783703	0.0103507	0.199704	0	0.149236	0.00221323	0.381972	0.200717	0.0691847	0.0119752	0	0.00104364	1.52718	0.110391	6.67122	0.0881096	1.69996	0	1.27036	0.01884	3.25151	1.70859	0.58893	0.101938	0	0.00888387	15.3995	1.98821	6.31585	5.03892	-0.00834856	100.984	313.382	229.812	224.085	417.245	873.08	838.928	229.812	-10.341
48.356	0.825	8.265	12.212	0.239	14.294	11.3	1.82	0.598	98.254	0.804807	0.0103257	0.162121	0	0.169975	0.00336919	0.354655	0.201501	0.0587296	0.0126971	0.0116328	0.00349759	1.50525	0.0911723	6.95066	0.0891769	1.40015	0	1.46797	0.0290977	3.06295	1.74025	0.507214	0.109657	0.100466	0.0302067	15.3571	1.8398	3.90898	8.69465	-0.121036	100.364	165.12	147.355	92.9503	-16.1196	647.866	786.188	147.355	-12.5894
Tietonggou Pluton
48.932	1.18	5.371	10.941	0.244	16.069	11.413	1.197	0.552	96.24	0.814393	0.0147688	0.105354	0	0.152284	0.00343967	0.398695	0.203516	0.038626	0.0117204	0.0163175	0.000874397	1.48893	0.0604511	7.11053	0.128948	0.919854	0	1.3296	0.030032	3.48104	1.77692	0.337246	0.102331	0.142469	0.00763443	15.2165	1.80094	5.55816	5.9397	-0.137527	98.4603	66.4062	86.4609	-49.2662	-804.289	233.397	768.127	86.4609	-12.6881
48.153	1.295	5.239	11.141	0.235	16.117	12.56	1.21	0.121	96.106	0.801428	0.0162082	0.102765	0	0.155068	0.0033128	0.399886	0.22397	0.0390455	0.00256914	0	0.000987223	1.47867	0.0589163	7.04591	0.142497	0.903477	0	1.36331	0.0291251	3.51568	1.96907	0.343276	0.0225871	0	0.00867936	15.3349	1.92525	3.77523	7.744	-0.00789729	98.4016	40.0628	74.1383	-97.4844	-1168.02	196.134	768.901	74.1383	-12.8891
49.482	1.176	5.027	11.782	0.202	16.139	11.541	1.396	0.451	97.217	0.823547	0.0147188	0.0986063	0	0.16399	0.0028476	0.400432	0.205799	0.0450475	0.00957588	0	0.000592334	1.50414	0.0558814	7.11776	0.127211	0.852235	0	1.41733	0.0246112	3.46085	1.77868	0.389337	0.0827625	0	0.00511942	15.2508	1.96192	5.80508	6.55851	-0.00473837	99.7558	62.9242	75.2806	-94.0107	-789.812	231.427	760.026	75.2806	-12.8233
48.919	1.082	5.119	11.743	0.248	15.322	11.53	1.355	0.486	95.826	0.814177	0.0135423	0.100411	0	0.163447	0.00349606	0.380161	0.205603	0.0437245	0.010319	0	0.00062054	1.47523	0.0578777	7.17466	0.119337	0.884838	0	1.44032	0.0308079	3.35004	1.81181	0.385307	0.0909329	0	0.0054683	15.288	1.92388	3.87187	8.25904	-0.00496401	98.1328	62.0106	76.3605	-90.0121	-768.54	274.88	751.317	76.3605	-13.5274
49.465	0.99	4.962	12.391	0.339	15.945	11.076	1.241	0.424	96.866	0.823264	0.0123908	0.0973313	0	0.172466	0.00477889	0.395618	0.197507	0.0400458	0.0090026	0	0.00093081	1.50585	0.0555416	7.10724	0.10697	0.840261	0	1.4889	0.0412561	3.41537	1.70508	0.345716	0.0777195	0	0.00803568	15.1285	1.96128	8.30296	4.91989	-0.00744601	99.6517	72.7194	80.3919	-61.5566	-836.944	197.161	768.144	80.3919	-12.7814
50.3	0.943	4.122	11.457	0.329	16.142	11.198	1.259	0.355	96.37	0.837161	0.0118025	0.0808544	0	0.159466	0.00463792	0.400506	0.199683	0.0406267	0.00753756	0.0133172	0.000338476	1.49443	0.0464074	7.28245	0.10267	0.703351	0	1.38719	0.0403451	3.48399	1.73703	0.35341	0.065569	0.115846	0.0029444	15.156	1.83818	5.81348	6.22595	-0.109239	98.6814	56.8001	66.0452	-129.918	-900.02	215.158	750.157	66.0452	-13.8057
48.992	1.118	5.052	12.57	0.3	15.592	11.089	1.264	0.4	96.395	0.815392	0.0139928	0.0990967	0	0.174958	0.0042291	0.38686	0.197739	0.040788	0.00849302	0	0.000507714	1.49453	0.0569015	7.0926	0.121715	0.861983	0	1.52185	0.0367864	3.36506	1.72001	0.35479	0.0738757	0	0.0044163	15.1487	1.95007	7.71697	5.62617	-0.00406146	99.1141	68.4846	80.1611	-67.4129	-854.749	197.539	766.983	80.1611	-13.0801
49.806	1.211	4.923	11.324	0.324	16.213	11.094	1.071	0.434	96.701	0.828939	0.0151568	0.0965663	0	0.157615	0.00456743	0.402268	0.197828	0.0345601	0.00921493	0.0145805	0.000676953	1.50511	0.0552845	7.15974	0.130913	0.834065	0	1.36136	0.03945	3.47448	1.70869	0.298503	0.0795914	0.125935	0.00584699	15.0868	1.83854	7.29532	4.75958	-0.122052	99.1484	62.1881	82.6931	-61.0193	-944.376	183.832	771.434	82.6931	-13.3155
48.231	1.29	5.856	11.75	0.185	15.403	11.358	1.339	0.584	96.011	0.802726	0.0161456	0.114867	0	0.163544	0.00260795	0.382171	0.202536	0.0432082	0.0123998	0	0.000423095	1.48206	0.066008	7.04116	0.141622	1.00757	0	1.43454	0.0228758	3.35223	1.77655	0.379003	0.108766	0	0.00371121	15.2643	1.93448	5.33407	6.95034	-0.00338455	98.4765	73.7494	91.9096	-35.6201	-689.909	260.474	768.633	91.9096	-12.7662
48.824	1.306	9.033	12.028	0.293	12.66	11.186	1.369	0.847	97.552	0.812596	0.0163458	0.177185	0	0.167414	0.00413043	0.314113	0.199469	0.0441763	0.017984	0	0.000169238	1.49178	0.101052	7.08128	0.142444	1.54406	0	1.45891	0.0359942	2.7373	1.73825	0.38497	0.15672	0	0.00147481	15.2799	1.94936	0	12.028	-0.00135382	99.5	134.904	181.579	139.795	-161.105	706.68	776.962	181.579	-14.106
49.227	1.267	5.496	10.122	0.18	16.22	11.5	0.948	0.457	95.433	0.819303	0.0158577	0.107806	0	0.140885	0.00253746	0.402441	0.205068	0.030591	0.00970328	0	0.000451302	1.48883	0.0621649	7.1539	0.138465	0.941328	0	1.23016	0.0221563	3.51399	1.79059	0.267111	0.084726	0	0.00394063	15.1424	1.9431	4.94648	5.67109	-0.00361019	97.8681	49.1334	89.5484	-58.9649	-1017.27	201.955	762.833	89.5484	-13.2203
50.048	1.168	5.203	10.551	0.204	16.244	11.733	0.868	0.427	96.446	0.832967	0.0146186	0.102059	0	0.146856	0.00287579	0.403037	0.209223	0.0280095	0.0090663	0	0	1.50241	0.0583622	7.20745	0.126491	0.883088	0	1.27071	0.0248835	3.48738	1.81035	0.242359	0.0784484	0	0	15.1312	1.96469	4.68318	6.33701	0	98.8799	41.5945	81.5138	-87.3207	-1142.13	187.1	749.815	81.5138	-13.6899
49.437	1.131	6.328	11.478	0.351	16.307	11.278	1.021	0.451	97.795	0.822798	0.0141555	0.124126	0	0.159758	0.00494805	0.4046	0.201109	0.0329466	0.00957588	0	0.000366683	1.53039	0.0699688	6.98933	0.120246	1.0544	0	1.35708	0.0420317	3.43691	1.70834	0.279868	0.0813432	0	0.00311482	15.0696	1.99816	8.91603	3.45524	-0.00293328	100.683	81.407	112.585	34.4055	-852.921	195.791	794.03	112.585	-12.3413
47.011	1.025	7.813	11.503	0.295	14.621	11.681	1.24	0.743	95.937	0.782421	0.0128289	0.153255	0	0.160106	0.00415862	0.362768	0.208295	0.0400136	0.0157758	0	0.000141032	1.47554	0.0880965	6.8934	0.113027	1.35023	0	1.41059	0.0366389	3.19611	1.83516	0.352533	0.13899	0	0.00124254	15.3267	1.92835	4.3055	7.62886	-0.00112818	98.2956	111.324	143.582	107.759	-476.364	388.348	788.765	143.582	-11.8203
46.633	1.083	7.326	10.555	0.318	15.122	11.45	1.451	0.64	94.79	0.77613	0.0135548	0.143702	0	0.146911	0.00448285	0.375198	0.204176	0.0468223	0.0135888	0.0110012	8.46191e-05	1.45998	0.0833264	6.91084	0.120695	1.27956	0	1.30813	0.0399164	3.34086	1.81803	0.416917	0.120998	0.0979569	0.000753468	15.3559	1.81498	4.33459	6.65468	-0.0886807	96.9506	129.138	135.741	97.0136	-337.546	425.799	804.445	135.741	-11.4712
48.522	1.051	7.387	9.978	0.377	16.239	11.477	1.198	0.267	96.759	0.807569	0.0131543	0.144899	0	0.13888	0.00531457	0.402913	0.204658	0.0386583	0.00566909	0.0135804	0.000141032	1.51273	0.0822486	6.94004	0.113044	1.24522	0	1.1935	0.045672	3.46253	1.75877	0.332219	0.0487187	0.116706	0.00121199	15.1397	1.86155	6.96958	3.70668	-0.109764	99.2091	102.825	143.309	97.9584	-638.698	294.002	818.448	143.309	-12.2214
[truncated: 32 more columns]
